# Supplementary material for: Templating nanotraffic light – dynamic tricoloured blinking silver nanoclusters on a graphene oxide film
Source: Royal Society of Chemistry journal article supplement (doi:10.1039/c8tc00191j), 2018-01-01
Supplement: c8tc00191j1.pdf [file c8tc00191j1.pdf]

**Contents of this supplementary file:**

List of figures:

- Figure S1. Systematic studies to optimise the deposition of tricoloured blinkers on rGO film.
- Figure S2. Importance of localised laser initiated reduction of GO in metal ion precursors ( $\text{AgNO}_3$ ).
- Figure S3. TEM analysis of deposited green fluorescence AgNPs.
- Figure S4. Importance of defect sites as electron traps.
- Figure S5. Importance of environmental stability for sustained and durable blinking behaviour of the NPs.
- Figure S6. Successful transfer of Ag NPs from patterned GO film onto flexible PDMS substrates.

**Table 1: Summary of the contents of the videoclips of the tricolored-blinking process**

| Video | Video File Name | Description of the video content                                                                                                                |
|-------|-----------------|-------------------------------------------------------------------------------------------------------------------------------------------------|
| V1    | V1.avi          | Tricolored blinking phenomenon from laser patterned micro-star shape. This video corresponds to the result illustrated in Figure 2.             |
| V2    | V2.avi          | Tricolored blinking phenomenon from laser patterned micro-square shape.                                                                         |
| V3    | V3.avi          | Zoom in view of Tricolored blinking phenomenon from laser patterned AgO/Ag <sub>n</sub> hybrid on rGO surface                                   |
| V4    | V4.avi          | Isolated nanoblinkers scattered over the sample surface. This video corresponds to the result illustrated in Figure 3 and 4.                    |
| V5    | V5.avi          | To illustrate the effect of patterning speed on the density of tricolored-blinkers on the rGO film. Here the patterning speed is 25 $\mu$ m/s.  |
| V6    | V6.avi          | To illustrate the effect of patterning speed on the density of tricolored-blinkers on the rGO film. Here the patterning speed is 50 $\mu$ m/s.  |
| V7    | V7.avi          | To illustrate the effect of patterning speed on the density of tricolored-blinkers on the rGO film. Here the patterning speed is 100 $\mu$ m/s. |
| V8    | V8.avi          | To illustrate the effect of patterning speed on the density of tricolored-blinkers on the rGO film. Here the patterning speed is 200 $\mu$ m/s. |
| V9    | V9.avi          | Single isolated tricoloured blinker on SiN TEM grid. This video corresponds to the result illustrated in Figure 5.                              |
| V10   | V10.avi         | Tricoloured blinkers fabricated on carbon nanotubes.                                                                                            |
| V11   | V11.avi         | Tricoloured blinkers fabricated on SiO <sub>2</sub> /Si wafer.                                                                                  |
| V12   | V12.avi         | Tricoloured blinkers fabricated on rGO after 11 days.                                                                                           |
| V13   | V13.avi         | Tricoloured blinkers fabricated on SiO <sub>2</sub> /Si wafer after 11 days.                                                                    |
| V14   | V14.avi         | Tricoloured blinkers fabricated on carbon nanotubes after 11 days.                                                                              |
| V15   | V15.avi         | Patterned tricoloured blinkers before submerging in Rhodamine B dye.                                                                            |
| V16   | V16.avi         | Patterned tricoloured blinkers after submerging in Rhodamine B dye for 10mins. Same sample as V20.                                              |
| V17   | V17.avi         | Patterned tricoloured blinkers after submerging in Rhodamine B dye for 100mins.                                                                 |
| V18   | V18.avi         | Tricoloured blinkers fabricated on PDMS.                                                                                                        |
| V19   | V19.avi         | Tricoloured blinkers fabricated on PDMS after 21 days.                                                                                          |
| V20   | V20.avi         | Tricoloured blinkers fabricated on PDMS before bending                                                                                          |
| V21   | V21.avi         | Tricoloured blinkers fabricated on PDMS during bending                                                                                          |
| V22   | V22.avi         | Tricoloured blinkers fabricated on PDMS after bending                                                                                           |

\*All videos are set to 39 frames per second.

### S1. Systematic studies to optimise the deposition of tricoloured blinkers on rGO film.

Power and speed dependent studies for controlled formation of AgNPs on GO substrate.

Figure S1 depicts SEM and corresponding FM images (under 450-500nm excitation) of the deposited Ag NPs.

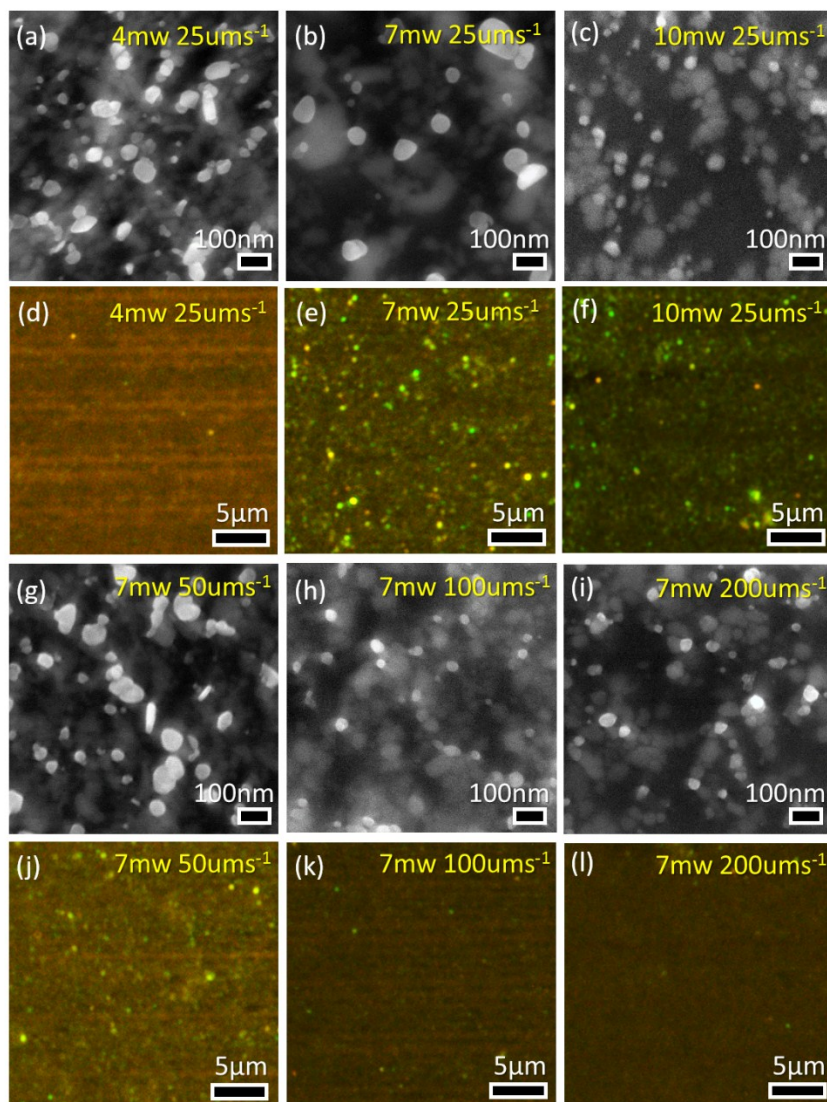

**Figure S1.** (a-c) SEM images of Ag NPs formed on GO under irradiation of (a) 4mW, (b) 7mW and (c) 10mW of 532nm laser. Speed of the patterning process was maintained at 25  $\mu\text{m/s}$ . (d-f) Corresponding FM images under blue illumination (450-500nm). (g-i) SEM images of Ag NPs formed on GO under the irradiation of 7mW of 532nm laser with speed of the patterning process being set at (g) 50  $\mu\text{m/s}$ , (h) 100  $\mu\text{m/s}$  and (i) 200  $\mu\text{m/s}$ . (j-l) Corresponding FM images under blue illumination (450-500nm).

## **S2. Importance of localised laser initiated reduction of GO in metal ion precursors ( $\text{AgNO}_3$ ).**

Importance of localised laser initiated reduction of GO in metal ion precursors ( $\text{AgNO}_3$ ). Figure S2(a) shows region of GO patterned in the absence of  $\text{AgNO}_3$ . From the patterned region, no fluorescence was observed. Repeating the same patterning process in the presence of  $\text{AgNO}_3$  yielded red, yellow and green fluorescence from the deposited Ag NPs (Figure S2(b)).

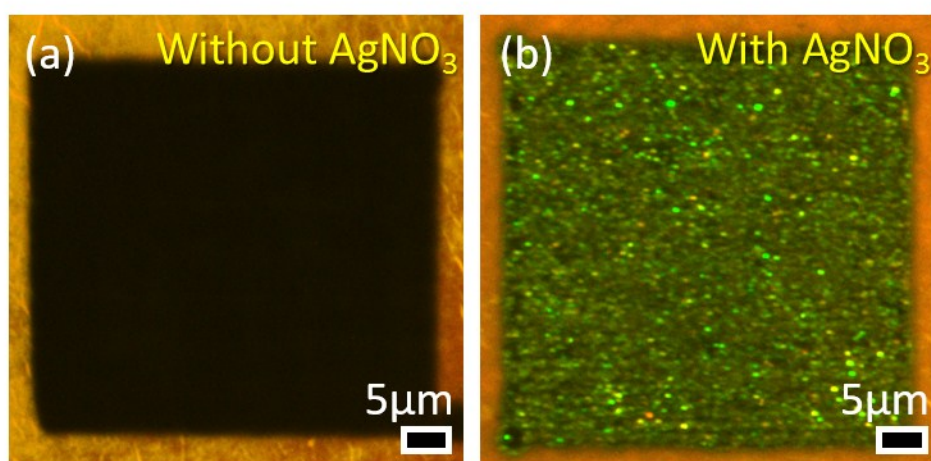

**Figure S2.** FM images of laser patterning of GO in the (a) absence and (b) presence of  $\text{AgNO}_3$  solution. Resulting in no formation of AgNPs in (a) and AgNPs decorated “Square” in (b).

### S3. TEM analysis of deposited green fluorescence AgNPs.

TEM analysis of deposited green fluorescence AgNPs. Figure S3 shows the TEM and SAED analysis of non-blinking but fluorescing NPs. Figure S3(a) shows the TEM image of the region within the red dotted box shown in the inset FM image (under blue light excitation (450-500 nm)). The demarcated red dotted box shows stable green fluorescence without blinking. Located near the red dotted box is a big NP responsible for bright yellow fluorescence without blinking. The typical size of these yellow fluorescence non-blinking NPs is in the micron-meter range. Figure S3(b) shows the SAED image of the region within the red dotted box. AgO crystal was not detected from the NPs responsible for the background green fluorescence. The rings from the SAED image suggests that the Ag NPs comprises of FCC (200) type and HCP (202) type crystalline structures. For the NP responsible for yellow fluorescence, the NP was too thick to obtain meaningful HR-TEM or SAED images.

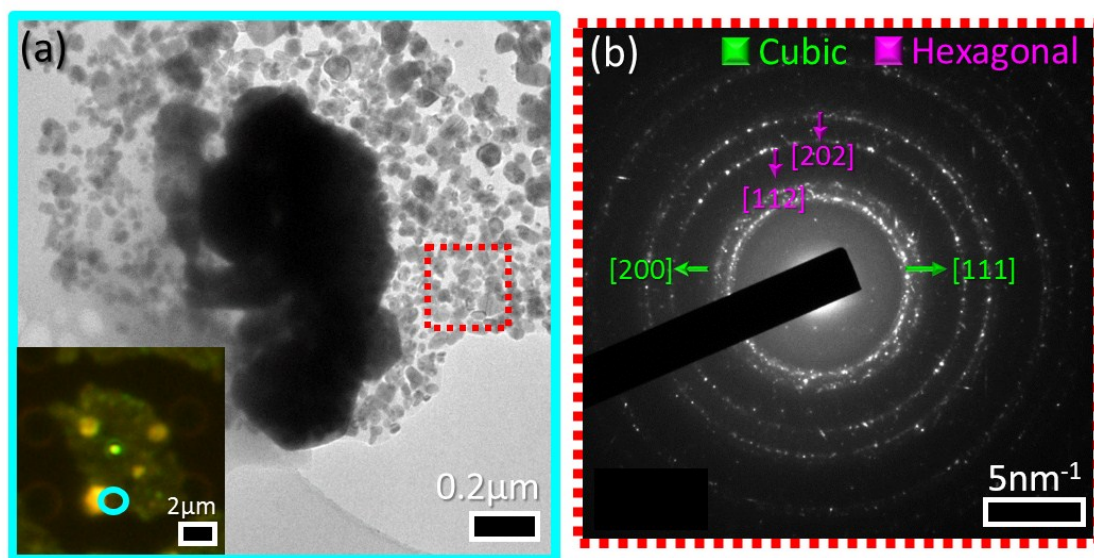

**Figure S3.** (a) TEM image of the region where the blue circle shown in the FM inset is located. (b) SAED of the region identified within the red dotted box in (a). Analysis of the diffracted rings shows the presence of FCC (200) type and HCP (202) type crystalline structures.

#### S4. Importance of defect sites as electron traps.

Importance of defect sites as electron traps. Figure S4 shows the results of laser initiated deposition of Ag NPs on both CNTs (Figure S4(a-d)) and SiO<sub>2</sub> (Figure S4(e-h)) surfaces. The deposited AgNPs on both surfaces exhibited tricoloured blinking phenomenon. This in turn provided strong evidence for the mechanism proposed in the main manuscript.

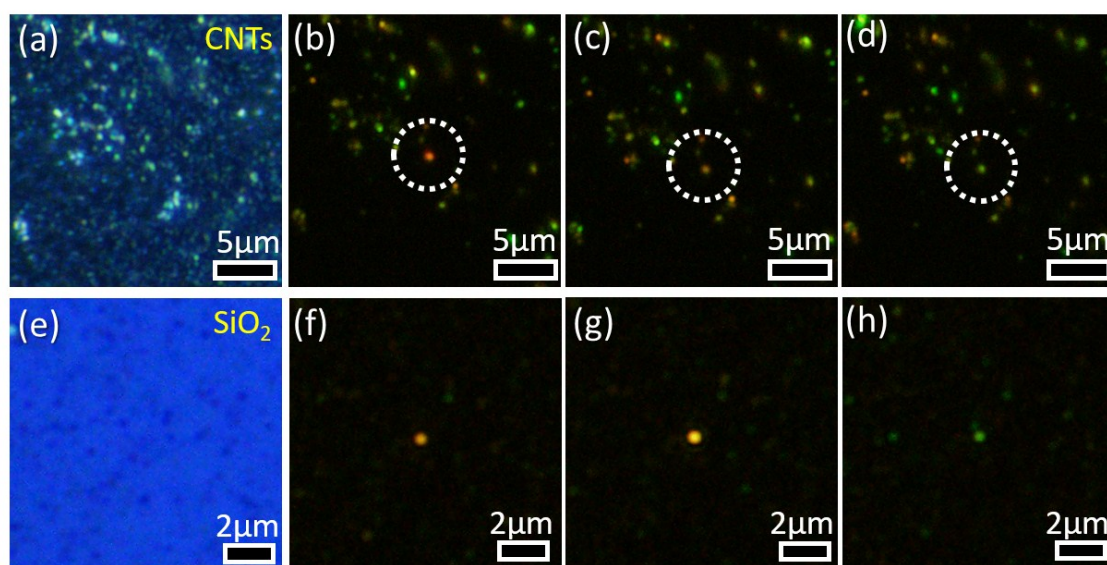

**Figure S4.** (a, e) BF optical images of AgNPs on (a) CNTs array and (e) oxygen etched SiO<sub>2</sub> wafer. (b-d, f-h) shows the corresponding FM images of (b-d) CNTs and (f-h) SiO<sub>2</sub> under blue excitation (450-500nm) with time sequence showing the presence of tricoloured blinking.



### S5. Importance of environmental stability for sustained and durable blinking behaviour of the NPs.

Importance of environmental stability for sustained and durable blinking behaviour of the NPs. For GO film (Figure 5(a-b)) and CNT (Figure 5(e-f)), the tricoloured blinkers continued blinking under blue light excitation 11 days after deposition. For oxygen etched SiO<sub>2</sub> (Figure 5(c-d)), most of the blinkers stopped blinking after 11 days. This is despite the fact that AgNPs were still found on the surface of SiO<sub>2</sub> as seen from the dark field images (Inset of Figure S5 (c)-(d)).

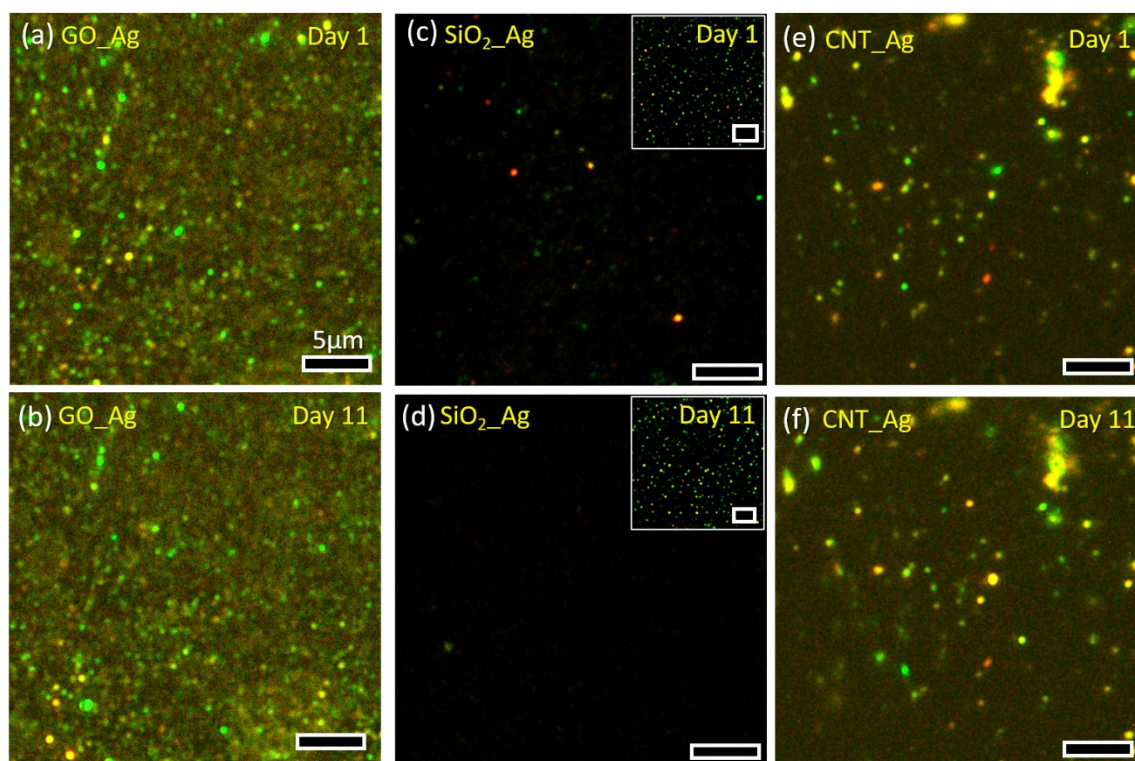

**Figure S5.** FM images of AgNPs on (a-b) GO, (c,d) Oxygen etched SiO<sub>2</sub> wafer. Insets show the dark field image of the sample showing the presence of nanoparticles but they are not blinking as actively and (e-f) CNTs. The images were taken during (a, c, e) day 1 and (b, d, f) day 11. All images are taken under blue excitation (450-500nm).

**S6. Successful transfer of Ag NPs from patterned GO film onto flexible PDMS substrates.**

Successful transfer of Ag NPs from patterned GO film onto flexible PDMS substrates. Figure S6 shows mirror image of the original Ag NPs patterned on GO film (Figure S6(a)) and the transfer Ag NPs pattern onto flexible PDMS substrate (Figure S6(b)). FM images under BF and blue (450-500 nm) excitation of both pre- (Figure S6(c)-(d)) and post-transferred (Figure S6(e)-(f)) AgNPs show preservation of the tricoloured blinking behaviour after the transfer process.

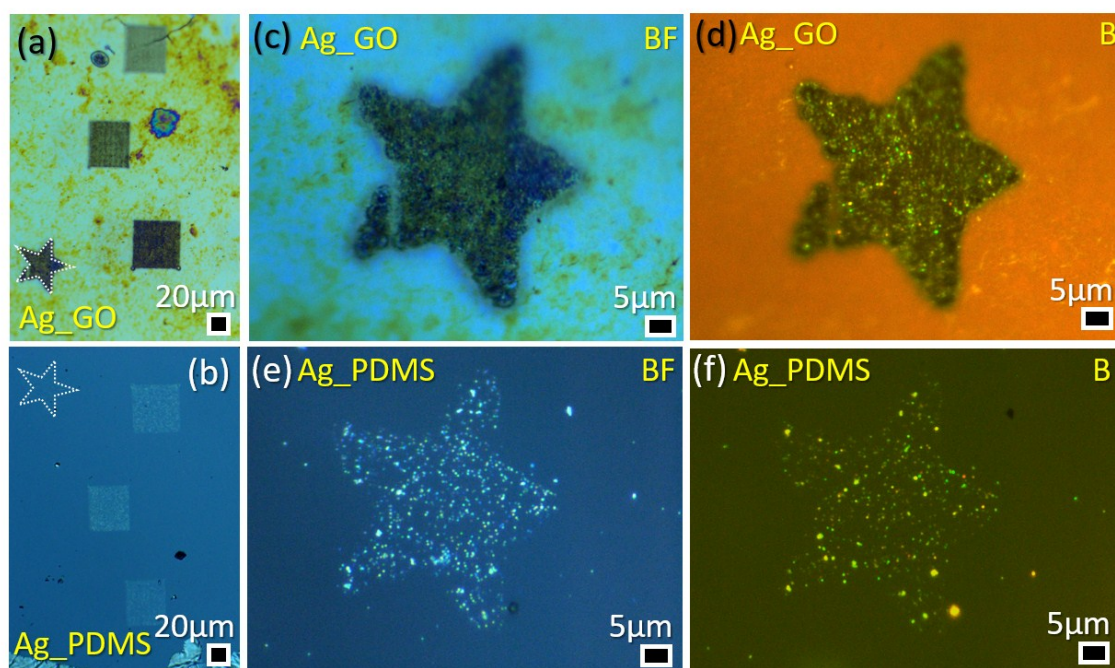

**Figure S6.** Optical images of (a) original AgNPs on GO and (b) transferred AgNPs on PDMS. FM images of AgNPs remaining on GO and PDMS under (c, e) BF and (d, f) B excitation.
